# Supplementary material for: Sono-Biosynthesis and Characterization of AuNPs from Danube Delta Nymphaea alba Root Extracts and Their Biological Properties
Source: MDPI journal article supplement (doi:10.3390/nano11061562), 2021-06-14
Supplement: s1 [file s1]

# Sono-biosynthesis and characterization of AuNPs from Danube Delta *Nymphaea alba* root extracts and their biological properties

Mihaela Cudalbeanu <sup>1,2</sup>, David Peitinho <sup>3</sup>, Francisco Silva <sup>3</sup>, Rosa Marques<sup>3,4</sup>, Teresa Pinheiro <sup>4,5</sup>, Ana C. Ferreira <sup>6</sup>, Fernanda Marques <sup>3,4</sup>, António Paulo <sup>3,4</sup>, Catarina F. Soeiro <sup>5</sup>, Sílvia Andreia Sousa <sup>5</sup>, Jorge Humberto Leitão <sup>5</sup>, Aurel Tăbăcaru <sup>1</sup>, Sorin Marius Avramescu <sup>2,7</sup>, Rodica Mihaela Dinica <sup>1,\*</sup> and Maria Paula Cabral Campello <sup>3,4,\*</sup>

- <sup>1</sup> Faculty of Sciences and Environment, Department of Chemistry Physical and Environment, “Dunărea de Jos” University of Galati, 111 Domnească Street, 800201 Galati, Romania; mihaela.cudalbeanu@ugal.ro (M.C.); aurel.tabacaru@ugal.ro (A.T.); Rodica.Dinica@ugal.ro
  - <sup>2</sup> Research Center for Environmental Protection and Waste Management, University of Bucharest, 91–95 Splaiul Independentei, 050095 Bucharest, Romania; [mihaela.cudalbeanu@ugal.ro](mailto:mihaela.cudalbeanu@ugal.ro) (M.C.); [sorin\\_avramescu@yahoo.com](mailto:sorin_avramescu@yahoo.com) (S.M.A.)
  - <sup>3</sup> Centro de Ciências e Tecnologias Nucleares, Instituto Superior Técnico, Universidade de Lisboa, Campus Tecnológico e Nuclear, Estrada Nacional 10, Km 139.7, 2695-066 Bobadela LRS, Portugal; dpeitinho@gmail.com (D.P.); fsilva@ctn.tecnico.ulisboa.pt (F.S.); rmarques@ctn.tecnico.ulisboa.pt (R.M.); fmarujo@ctn.tecnico.ulisboa.pt (F.M.); apaulo@ctn.tecnico.ulisboa.pt (A.P.); [pcampelo@ctn.tecnico.ulisboa.pt](mailto:pcampelo@ctn.tecnico.ulisboa.pt) (M.P.C.C.)
  - <sup>4</sup> Departamento de Engenharia e Ciências Nucleares (DECN), Instituto Superior Técnico, Universidade de Lisboa, Estrada Nacional 10, 2695-066 Bobadela LRS, Portugal; rmarques@ctn.tecnico.ulisboa.pt (R.M.); [teresa.pinheiro@tecnico.ulisboa.pt](mailto:teresa.pinheiro@tecnico.ulisboa.pt) (T.P.); fmarujo@ctn.tecnico.ulisboa.pt (F.M.); [apaulo@ctn.tecnico.ulisboa.pt](mailto:apaulo@ctn.tecnico.ulisboa.pt) (A.P.); [pcampelo@ctn.tecnico.ulisboa.pt](mailto:pcampelo@ctn.tecnico.ulisboa.pt) (M.P.C.C.)
  - <sup>5</sup> iBB-Institute of Bioengineering and Biosciences, Department of Bioengineering, Instituto Superior Técnico, University of Lisbon, 1049-001 Lisbon, Portugal; [teresa.pinheiro@tecnico.ulisboa.pt](mailto:teresa.pinheiro@tecnico.ulisboa.pt) (T.P.); catarina.soeiro@tecnico.ulisboa.pt (C.F.S.); sousasilvia@tecnico.ulisboa.pt (S.A.S.); jorgeleitao@tecnico.ulisboa.pt (J.H.L.)
  - <sup>6</sup> Centro de Química Estrutural, Instituto Superior Técnico, Universidade de Lisboa, Campus Tecnológico e Nuclear, Estrada Nacional, Estrada Nacional 10, Km 139.7, 2695-066 Bobadela LRS, Portugal; acferreira@ctn.tecnico.ulisboa.pt
  - <sup>7</sup> Faculty of Chemistry, Department of Organic Chemistry, Biochemistry and Catalysis, University of Bucharest, 90–92 Soseaua Panduri, 050663 Bucharest, Romania;
- \* Correspondence: rodica.dinica@ugal.ro (R.M.D.); [pcampelo@ctn.tecnico.ulisboa.pt](mailto:pcampelo@ctn.tecnico.ulisboa.pt) (M.P.C.C.)

The HPLC-DAD chromatographic separation and identification technique of total polyphenol compounds based on the retention time of standard references showed in the *N. alba* ethanolic root extract the presence of gallic acid, epicatechin (-), p-coumaric acid, daidzein, rutin, hyperoside and naringin (Figure S1). Our previous studies showed the presence of 20 polyphenol compounds in the *N. alba* methanolic root extract such as HHDP-hexoside, quinic acid, corilagin, vanillic acid, castalin, gallic acid, caffeic acid, p-coumaric acid, tannic acid, rutin, ellagic acid, ellagic rhamnosyl acid, naringenin, naringin, ferulic acid, catechin, epicatechin, apigenin, brevifolin and orientin [47].

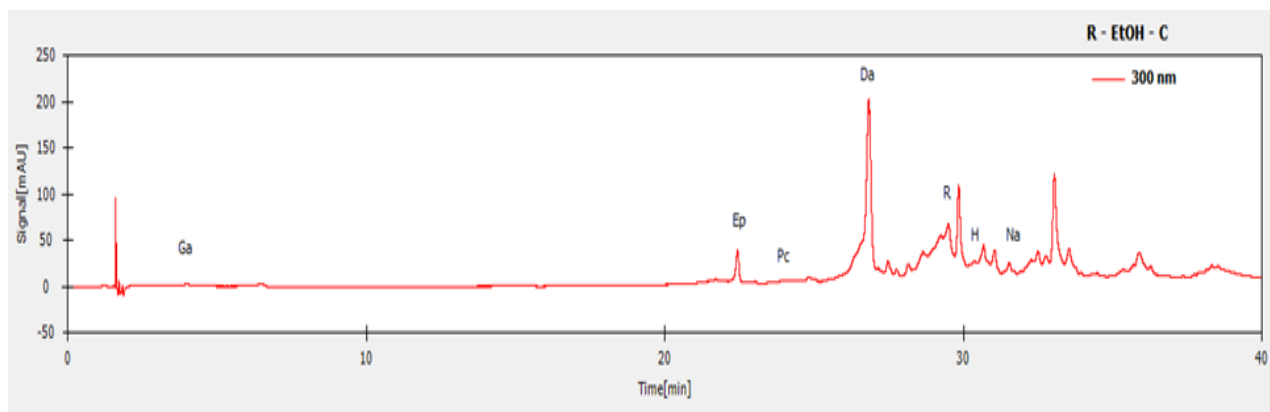

**Figure S1.** HPLC-DAD chromatogram of *N. alba* root extract with detection at 300 nm. Peaks identified were Ga – gallic acid, Ep – epicatechin, Pc - p-coumaric acid, Da – daidzein, R – rutin, H – hyperoside, Na – naringin.

The quantification of polyphenol compounds from the *N. alba* root extract are illustrated in the Table S1. Of these it distinguish epicatechin (-) which has the highest concentration ( $119.11 \pm 3.04$  mg/kg), followed by daidzein ( $28.96 \pm 0.99$  mg/kg) and rutin ( $9.11 \pm 0.28$  mg/kg).

**Table S1.** HPLC-DAD identification and quantification of polyphenols from the *N. alba* root extract.

| Peak | Compound        | T <sub>R</sub> * (min) | T <sub>R</sub> ** (min) | Amount (mg/kg)    |
|------|-----------------|------------------------|-------------------------|-------------------|
| Ga   | Gallic acid     | 3.78                   | 3.99                    | $2.05 \pm 0.01$   |
| Ep   | Epicatechin (-) | 23.02                  | 23.15                   | $119.11 \pm 3.04$ |
| Pc   | p-Coumaric acid | 24.06                  | 24.09                   | $2.50 \pm 0.01$   |
| Da   | Daidzein        | 26.44                  | 26.65                   | $28.96 \pm 0.99$  |
| R    | Rutin           | 29.69                  | 29.72                   | $9.11 \pm 0.28$   |
| H    | Hyperoside      | 30.60                  | 30.79                   | $0.98 \pm 0.01$   |
| Na   | Naringin        | 31.55                  | 31.56                   | $2.01 \pm 0.01$   |

\* Retention time (T<sub>R</sub>) mean error for standard references was  $\pm 0.0001$ –0.2 min.

\*\* Retention time (T<sub>R</sub>) mean error for compounds was  $\pm 0.0001$ –0.2 min.

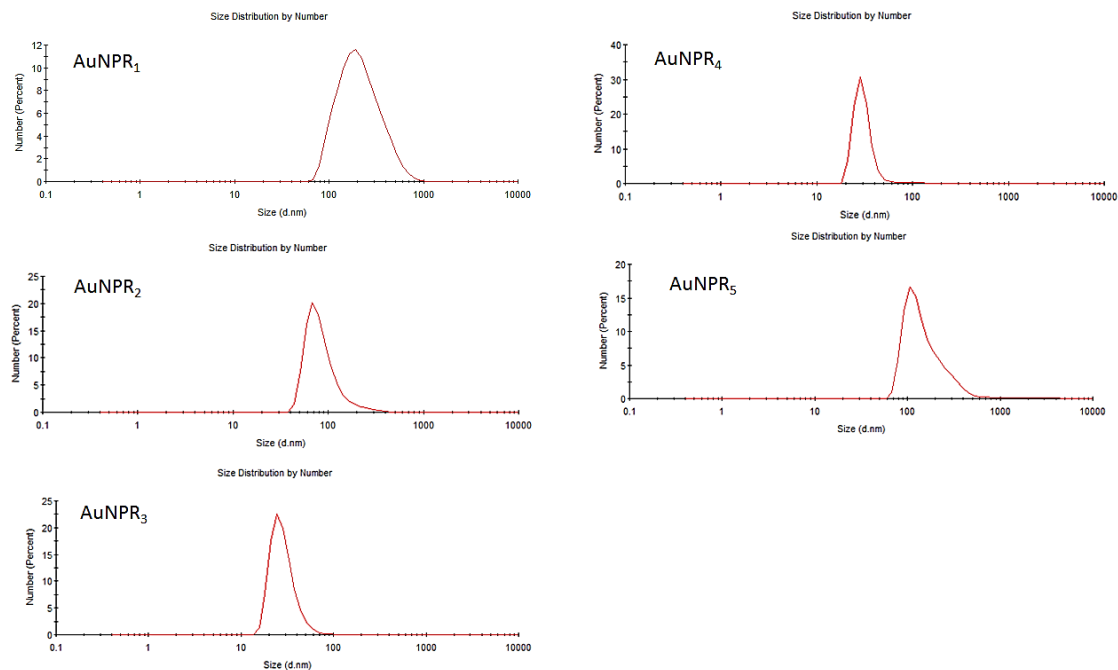

**Figure S2.** Size distribution plot of AuNPR<sub>n</sub> (n=1-5) by DLS analysis.

**Table S2.** Hydrodynamic sizes of the AuNPR<sub>n</sub>.

|                    | Hydrodynamic size<br>(PDI)<br>(nm) |
|--------------------|------------------------------------|
| AuNPR <sub>1</sub> | 280.2 ± 27.6 (0.23 ± 0,01)         |
| AuNPR <sub>2</sub> | 150.0 ± 29.8(0.20±0,04)            |
| AuNPR <sub>3</sub> | 60.7± 5.4(0.22 ± 0,01)             |
| AuNPR <sub>4</sub> | 32.3 ± 6.7(0.35 ± 0,01)            |
| AuNPR <sub>5</sub> | 209.8± 41.6(0.28 ± 0,02)           |

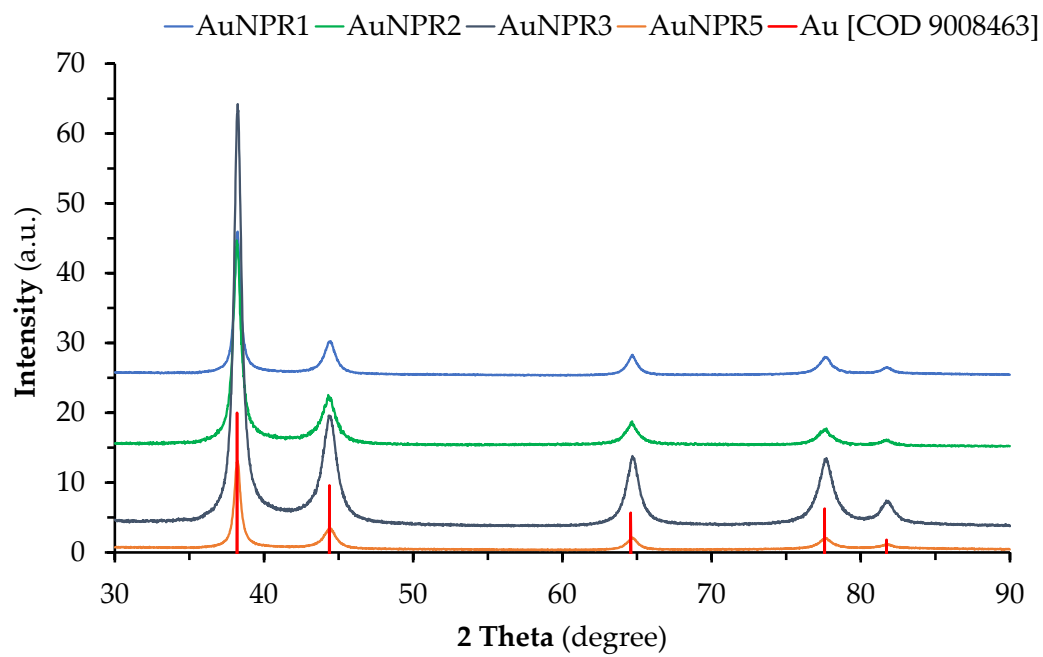

Figure S3. XRD patterns of AuNPRn samples.

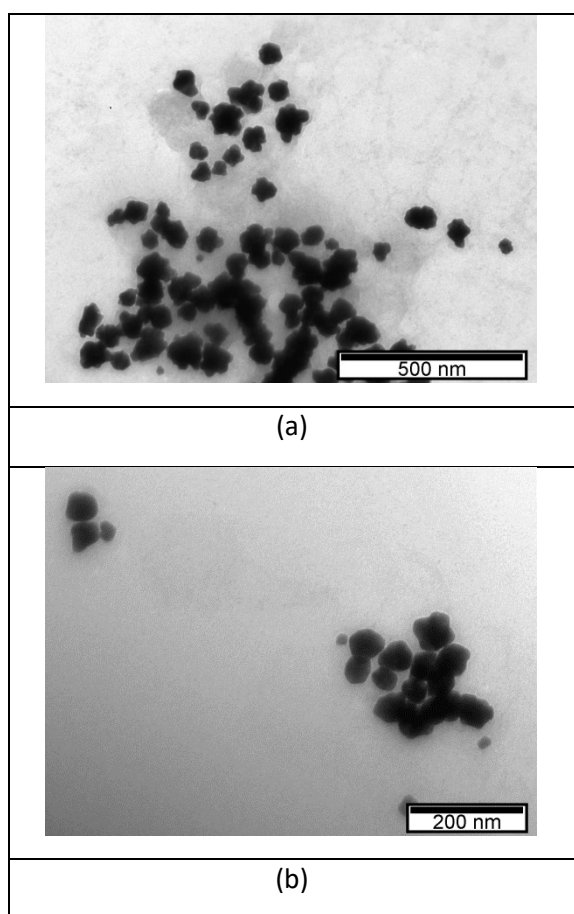

Figure S4. TEM images of AuNPR<sub>2</sub> (a), AuNPR<sub>3</sub> (b).

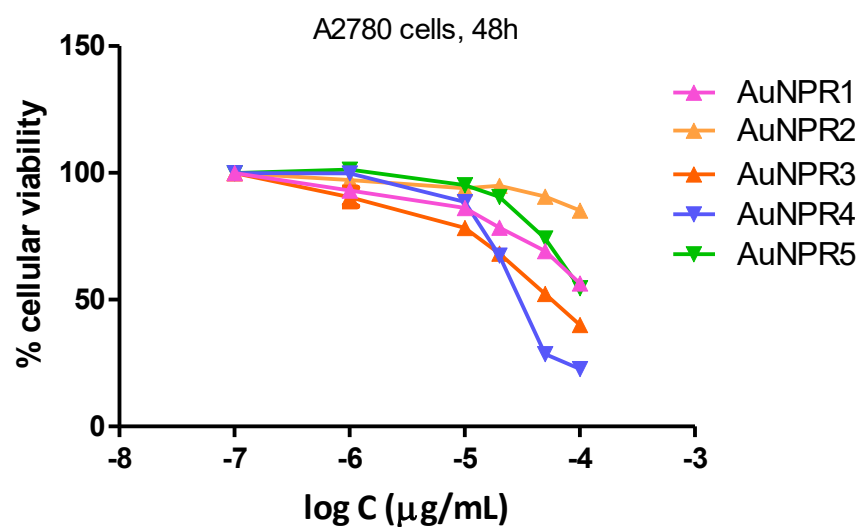

a)

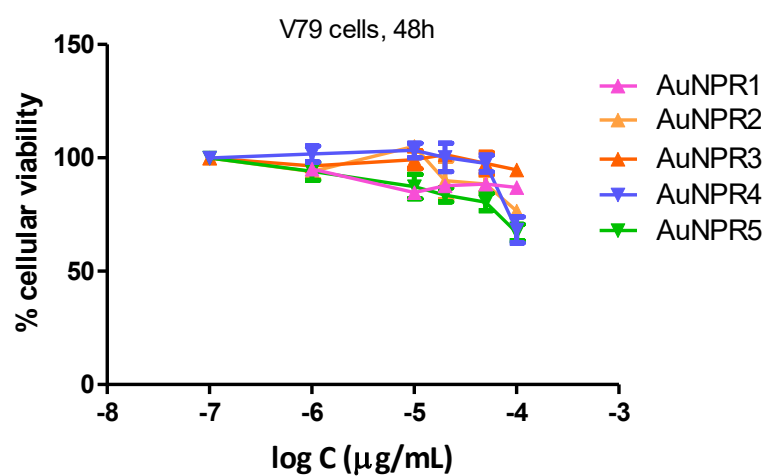

b)

Figure S5. Dose-response curves obtained using the GraphPad Prism software to determine the  $\text{IC}_{50}$  values for AuNPR<sub>n</sub> upon incubation with the A2780 cells (a) and the V79 cells (b) for 48h.
